# Supplementary material
Source: PubMed Central journal article supplement (PMC2997042)
Supplement: supp_01082.2009_suppmat.pdf [file supp_01082.2009_suppmat.pdf]

# 1 Supplementary Material

## 2 I. Marking Study

### 3 Abstract

4 In the main body of this paper we presented an HFO detection and classification algorithm that requires  
5 no manual intervention. In this supplement, we compare the performance of the automated method  
6 with that of three expert human reviewers on an HFO verification task. Our main qualitative conclusion  
7 is that human reviewers are currently not in sufficient agreement about what constitutes an HFO to  
8 place high emphasis on ground truth data in detection benchmarking; and we find that the automated  
9 approach is statistically indistinguishable from humans in the classification task.

### 10 Introduction

11 Despite the proliferation of tools for automatically detecting seizures and other epileptiform activity, no  
12 algorithm yet exists for the fully automated extraction of 100-500 Hz transient high-frequency  
13 oscillations (HFOs) from intracranial EEG recordings. Several authors have reported on *semi-automated*  
14 approaches (Crépon et al. 2010; Csicsvari et al. 1999a; b; Staba et al. 2002) to HFO detection, which use  
15 intensive visual pre- and post-processing in conjunction with machine detection. As Gardner et al.  
16 discuss (Gardner et al. 2007), none of these groups presents formal validation data for their automated  
17 methods; acceptable detection performance is either implicit or simply asserted. Staba et al. (Staba et  
18 al. 2002), for example, state without demonstration that “during development of [their] technique, it  
19 was found that it was effective in detecting greater than 84% of putative oscillatory events observable  
20 with visual EEG analysis.”

21

22 “Gold standards” for HFO detection

23

24 How concerned should one be, at this point in time, about the scarcity of formal validation data for  
25 published machine HFO detection algorithms? Below we argue that, given the current state of the field,  
26 it would be misguided to place too strong an emphasis on classical performance metrics for existing or  
27 proposed automated detectors. As justification for this opinion, we offer the following three points.  
28 First, even in the absence of rigorous direct validation, current methods are undoubtedly *useful*, as  
29 evidenced by their widespread acceptance: several research groups (Crépon et al. 2010; Schevon et al.  
30 2009; Staba et al. 2007; Staba et al. 2002; Worrell et al. 2008) have adopted methods similar to those  
31 originally presented without formal validation by Csicsvari et al. (Csicsvari et al. 1999a), for instance, and  
32 have done so with success – where “success” means simply that detected events turned out to be  
33 related to outcome measures of scientific interest.

34

35 Second, as the results of Gardner et al. (Gardner et al. 2007) show, the task of having clinicians visually  
36 *identify* transient oscillations in iEEG – a requirement for generating ground truth data against which to  
37 evaluate automated methods – does not yield the complete set of events that is *verified* by the same  
38 reviewers when presented with a superset of their own markings containing those of a machine  
39 detector as well. Though the Gardner study involved oscillations in the gamma band, it seems likely that  
40 their conclusion that human reviewers tend to make many false negative errors would also apply to 100-  
41 500 Hz HFOs. In fact, one might expect the effect to be even larger, both because 100-500 Hz HFOs are  
42 less familiar to clinical reviewers and vigilance requirements for marking are even more demanding  
43 given the higher recording bandwidths. Findings like those of Gardner et al. call into question the  
44 sensibility of using a set of human markings as an absolutely rigid benchmark for automated detectors.

45

46 Lastly, insisting on perfect establishment of ground truth tends to raise the distracting existential  
47 question “what *is* an HFO?” HFOs are, after all, human constructs, employed because they presumably  
48 help us understand or communicate about the workings of the brain. Far more critical than pinning  
49 down specifically which waveforms *are* and *are not* HFOs, a priori, is using the concept of an HFO to  
50 probe the data for evidence of its validity and practical utility. Taking this empirical tact, we settle for a  
51 crude detector – one that has been vetted by clinical opinion for its ability to find at least *some* things  
52 resembling what would catch the eyes of human reviewers – and we analyze its imperfect outputs. If  
53 we find results of scientific importance, we can use them to refine our understanding of what the critical  
54 properties of HFOs are and subsequently to optimize our detector, in the hope that we will extract  
55 more, or different, information in the next iteration. This evolutionary view of detector design is a  
56 fundamental to the approach we have taken in this work.

57

58 What we should be asking of the earliest incarnations of fully automated methods, then, is not whether  
59 they meet premature and arbitrary performance specifications for detection, but whether they can  
60 approximate the successes of semi-automated methods *without data pre-selection and post-processing*  
61 *by humans*. The latter limit the scientific interpretability of conclusions about HFOs and seizure  
62 generation – including our ability to assess the generalizability and clinical utility of those findings – to a  
63 far greater degree than the odd percentage point of sensitivity or specificity.

64

65 *The present study*

66

67 At the same time we offer this lengthy caveat, we also appreciate that it is helpful for practitioners who  
68 wish to evaluate our algorithm to understand it within the context of human performance. In the work

69 we describe below, we asked three board-certified epileptologists to classify detected HFO candidates  
70 and compared their markings with the outputs of our automated classifier.

## 71 **Methods**

### 72 *Reviewer Labeling*

73 Five thousand HFO candidates (~0.4%) were randomly selected among all those identified in stage 1,  
74 across all patients. As a conservative measure, we excluded all events from the two subjects (CT 01 and  
75 SZ 05) from whom a subset of data had been used to develop artifact-distinguishing features. The  
76 remaining 4,773 randomly selected events, across ten patients (nine epilepsy and one control)<sup>1</sup>, were  
77 then used in a human labeling experiment.

78 Three board-certified neurologists independently marked all presented events as either valid (positive)  
79 or invalid (negative) HFOs, according to the following criteria for what constitutes a valid HFO: “Any  
80 *transient, quasi-periodic voltage variation with predominant frequency between 100 and 500 Hz, lasting*  
81 *on the order of tens of milliseconds, standing prominently apart from the background signal, and having*  
82 *apparently physiologic origin.” The criteria were intentionally somewhat vague to reflect the fact that  
83 there is currently no standard operational definition of an HFO.*

84 Events were presented to reviewers via a custom Matlab graphical user interface (GUI), shown in Figure  
85 S1. The GUI was comprised of four complementary views of each HFO candidate. The bottom view  
86 displayed roughly 1 second (0.5 seconds on either side of the candidate) of 5 Hz–1 kHz<sup>2</sup> single-channel

---

<sup>1</sup> For CT 01, 1 of 1 data file was used in artifact training; for SZ 05, only 1 of 8 total files was used in training. Thus, the number of subjects from whom events were drawn for the labeling experiment is only one less than the total number of patients, not two.

<sup>2</sup> Display distortion was in practice negligible at this default timescale due to the relatively low signal power above the effective Nyquist frequency of the display. As reviewers were free to zoom in (but not out), this compromise allowed us to faithfully represent the full bandwidth across nearly all available time scales without the need for zoom-adaptive filtering.

87 iEEG, sampled at 2,713 Hz, with vertical scaling of 21  $\mu\text{V}/\text{mm}$ . The event under consideration was  
88 delimited by red lines (solid, start; dotted, stop) and the view could be scrolled for 30 seconds on either  
89 side of the default display window. The top, left view was of the raw data (near DC—9 kHz, 32,556 Hz  
90 sampling rate) corresponding to the detection; the top, middle view was of the bandpassed data  
91 corresponding to the detection (100-500 Hz, 2713 Hz sampling rate); and the top, right view was a  
92 frequency-domain representation of the middle view. Unlike the bottom view whose vertical scaling  
93 was fixed, all top views were auto-scaled to fit their viewing windows. Reviewers were free to edit their  
94 markings until they had labeled every event and declared the task complete.

95 The human labeling task was binary, while the automated algorithm classified detections into one of five  
96 groups: four clusters, plus a fifth group (“Cluster 0”) comprised of detections that were eliminated in  
97 stage 2. In order to compare human and machine performance directly, we took as machine-negative  
98 all events in cluster 0 and in cluster 2, whose centroid bore the closest qualitative resemblance to the  
99 artifacts we had designed features to identify. All other clusters were taken as machine-positive. This  
100 post-hoc labeling decision was made blinded to the human reviewers’ markings; and while made  
101 manually for the present experiment, we note that it could readily be made automatically in the future if  
102 desired – for example by storing the coordinates of the cluster 2 centroid and assigning the negative  
103 HFO label to an automatic cluster whose centroid was sufficiently nearby.

#### 104 *Data Analysis*

105 We use the chi-squared test of homogeneity to test whether HFO counts are distributed identically  
106 across populations (where “population” is analysis-dependent and clear from context below), and the  
107 chi-squared test of independence to test whether marker labels are independent. The chance model we  
108 use for markers assigns a positive label to each event with probability  $p = N_p/N$ , with  $N_p$  the total

109 number of events actually labeled positive by the marker and N the total number of marked events  
110 (4,773).

## 111 **Results**

112 In describing the results below, we use the term “reviewer” to refer specifically to humans and  
113 “marker,” more generally, as a term that encompasses both humans and the machine algorithm. The  
114 terms “detection” and “event” are used synonymously.

### 115 *Putative prevalence of valid HFOs by marker*

116 Human reviewers were not in agreement about the overall prevalence of HFOs in the data set of  
117 candidates presented to them. The percentages of detections marked as positive HFOs by reviewers A,  
118 B, C, and the machine classifier (M) were 24.6%, 5.5%, 11.5%, and 13.0%, respectively. We rejected the  
119 null hypothesis that the proportion of detections marked as positive was independent of human  
120 reviewer ( $\chi^2(2, N = 14,319) = 763.84, p \ll 0.0001$ ). Also apparent from these numbers is that the  
121 automated method’s propensity to mark events as positive is not extreme relative to humans’.

### 122 *Human reviewer preference by cluster*

123 Reviewers had clear and differing cluster preferences. Figure S2A shows, for each human reviewer, all  
124 events falling into clusters 1-4 that were classified as positive HFOs. For reviewer A, the majority of such  
125 detections (57.1%) fell into cluster 4. The largest clusters for Reviewer B were 3 and 4, with the former  
126 (44.3%) favored over the latter (27.1%). Reviewer C displayed yet a third pattern, splitting a majority  
127 fairly evenly between clusters 1 (42.0%) and 4 (41.4%). For all three human reviewers, the smallest  
128 percentage was in cluster 2 (6.1%, 13.6%, and 1.9%, for A, B, and C, respectively), the putative artifact  
129 class. We reject the null hypothesis that the proportion of detections in each of the four clusters was  
130 the same across human reviewers ( $\chi^2(6, N = 563) = 97.40, p \ll 0.0001$ ).

131 Figure S2B shows, for each human reviewer, all events falling into clusters 1-4 that were classified as  
132 negative HFOs. As expected, the putative artifact cluster dominates for all three reviewers: 43.3%,  
133 36.1%, and 39.3% for reviewers A, B, and C, respectively. And as is the case for positive labels, we again  
134 reject the null hypothesis that the proportion of detections in each of the four clusters was the same  
135 across human reviewers ( $\chi^2(6, N = 2197) = 41.47, p \ll 0.0001$ ). Not shown in figure S2 are events that  
136 were marked as "0" by the automated detector – detections that were never classified into clusters 1-4  
137 due to elimination in stage 2. These events are accounted for below, where we give standard  
138 performance metrics for the automated classifier against a ground truth set derived from the human  
139 reviewers' markings.

#### 140 *Inter-rater agreement*

141 A question of fundamental importance in defining ground truth data is to what degree independent  
142 human reviewers agree amongst themselves regarding what constitutes an HFO and what does not.  
143 Table S1 gives contingency tables, including the kappa score (Cohen 1960) and percentage agreement,  
144 for each of the three human-human marker pairs (top) and each of the three machine-human marker  
145 pairs. For all tables, we reject at the 5% significance level the null hypothesis that marker labels were  
146 independent, and the kappa values greater than one indicate that these difference were in the direction  
147 of agreement in all cases (AB: ( $\chi^2(1, N = 4773) = 260.94, p \ll 0.0001$ ); AC: ( $\chi^2(1, N = 4773) = 25.09, p \ll$   
148  $0.0001$ ); BC: ( $\chi^2(1, N = 4773) = 298.50, p \ll 0.0001$ ); MA: ( $\chi^2(1, N = 4773) = 85.80, p \ll 0.0001$ ); MB:  
149 ( $\chi^2(1, N = 4773) = 270.96, p \ll 0.0001$ ); MC: ( $\chi^2(1, N = 4773) = 139.94, p \ll 0.0001$ );). The average  
150 pairwise percentage agreement among human reviewers was 79%, while that for machine-human pairs  
151 was 80%. The average pairwise kappa score among human reviewers was 0.15, while that for machine-  
152 human pairs was 0.17. The latter average, however, and the individual kappa scores that comprise it are  
153 not straightforward to interpret given the different biases of the reviewers.

154 We also note that we have aggregated across subjects in computing these inter-rater agreement  
155 measures. Given the rarity of positive HFOs, sample sizes were too small to compute reliable statistics  
156 on an individual subject basis. But inspecting kappa scores leads us to hypothesize that the degree of  
157 inter-marker agreement and the differences between human-human and machine-human pairs may  
158 vary with patient. For example, average human-human kappa for SZ 05 (1627 events) was 0.21 while  
159 the machine-human value was 0.27; for SZ 07 (1448 events) average performance was near chance for  
160 both human-human (-0.07) and machine-human (0.01) pairs; and for SZ 03 (295 events) average human-  
161 human kappa was 0.37, while average machine-human kappa was 0.19. It would be instructive to  
162 investigate these differences more systematically by conducting another marking experiment in which  
163 larger random samples of equal sizes were drawn from each subject.

164 The main conclusion we reach is that a given human is no more consistent with another human in his  
165 markings than he is with the machine.

#### 166 *HFO ambiguity*

167 Ground truth looks very different depending on which of several plausible defining rules is adopted.  
168 33.7%<sup>3</sup> of all detections were marked by at least one human reviewer as positive HFOs, while 39.6%<sup>4</sup> of  
169 all detections were marked by at least one marker as positive. 6.0%<sup>5</sup> of events were marked by at least  
170 two human reviewers (i.e. majority consensus) as positive HFOs, while 10.3%<sup>6</sup> of all events were labeled  
171 positively by at least two markers. Only 2.0%<sup>7</sup> of events were marked by all three viewers (i.e.

---

<sup>3</sup> Chance, which should be higher = 36.9%.

<sup>4</sup> Chance, which should be higher = 45.1%.

<sup>5</sup> Chance, which should be lower = 4.5%.

<sup>6</sup> Chance, which should be lower = 8.7%.

<sup>7</sup> Chance, which should be lower = 0.16%.



172 unanimous consensus) as valid HFOs, while 2.5%<sup>8</sup> of all events were marked by at least three markers as  
173 positive<sup>9</sup>. The range of these values, which is affected by both the marginal probabilities displayed by  
174 each marker and the degree to which they tend to actually agree, gives one view of the general  
175 uncertainty among reviewers about what counts as an HFO.

#### 176 *General classifier performance metrics*

177 We formed a ground truth data set by labeling as positive all events marked positively by at least two  
178 human reviewers (i.e. majority human vote) and as negative all remaining events. The overall accuracy  
179 of the automated classifier against this benchmark was 86.7%. Sensitivity was a moderate 46.8%,  
180 reflecting the conservatism of Stage 2, which was designed to retain only events with large *spectral*  
181 dissimilarity from the background, a condition not explicitly enforced in the marking instructions for  
182 reviewers and to which we anticipated not all would adhere. Specificity was 89.2%, reflecting strong  
183 classification performance for negative events. Given the relatively high marginal probability of  
184 negative events, however, precision was 21.5%. The  $F_1$ -measure, the harmonic mean of precision and  
185 sensitivity, was 0.30.

186 The precision metric reported above for the automated procedure should be viewed in light of the  
187 sparseness of positive events and in terms of its improvement on Stage 1 alone. Moving from a data set  
188 that is 6% “pure”<sup>10</sup> to one that is 21.5% pure is an improvement of 258%. It is also important to  
189 remember that precision, as well as the other performance metrics we report, is highly dependent on  
190 our definition of ground truth. If we consider a ground truth data set whose positively labeled examples

---

<sup>8</sup> Chance, which should be lower = 0.74%.

<sup>9</sup> All reported values were significantly different at the 5% level (chi-squared test) from their chance values, which were computed using the marginal probabilities displayed by each marker. For brevity, we have omitted these results, as they are tangential to the point of the paragraph.

<sup>10</sup> Six percent is the probability that a given event emerging from stage 1 would be declared a positive HFO by at least two human reviewers.

191 are the union of all three human reviewers' positive markings, for example, the precision improves to  
192 54.6% (with the  $F_1$ -measure improving slightly, indicating that this increase is not completely  
193 counterbalanced by a decrease in sensitivity). Also, the precision metric reported above is an  
194 aggregated measure with respect to the machine clustering. The precision for each of the four clusters  
195 considered individually is different and in some cases higher than this aggregate measure, as we discuss  
196 below.

197 Table S2 shows the performance results obtained when we modify our ground truth definition in a  
198 manner consistent with the recommendations of Gardner et al. (Gardner et al. 2007). The modified  
199 ground truth set considers any event marked by at least two markers, human or automated, to be a  
200 positive HFO. The table compares the performance of each marker against this hybrid human-machine  
201 ground truth, and also gives the difference between each metric and that expected under a chance  
202 model. Chance values, which can be computed exactly, were for convenience generated by simulation  
203 in the following way. For each rater, 100 random  $m \times n$  marking matrices were generated, where  $m$   
204 was the total number of marked events (4,773) and  $n$  was the total number of markers (4). Random  
205 marking matrices were drawn according to actual probability mass function displayed by each reviewer.  
206 For each trial, performance metrics were computed using the modified ground truth rule described  
207 above, and the 100 values in each performance metric category were averaged to yield a final expected  
208 value for each. Values in parentheses in the table are the differences between the observed values and  
209 these chance values.

#### 210 *Machine cluster purity*

211 Given a machine-positive HFO cluster (i.e. 1, 3, or 4) the probability that one of its members was also  
212 marked positive by human reviewers was dependent on cluster. Table S3 shows these results for two  
213 cases, one in which ground truth positive is taken to be the union of all human reviewer positive

214 markings and one in which ground truth positive is taken to be a majority vote. For completeness, we  
215 also include the values computed for cluster 2. For both the majority ground truth ( $\chi^2(2, N = 619) =$   
216  $13.64, p = 0.0011$ ) and the union ground truth ( $\chi^2(2, N = 619) = 33.88, p \ll 0.0001$ ), we reject the null  
217 hypothesis that the proportion of ground truth positive events occurring in each of the three machine  
218 positive clusters is the same.

## 219 **Discussion**

220 The results of this marking study strongly reinforce the idea that we are in the nascent stages of  
221 describing high frequency oscillations within the brain. Human reviewers do not agree on the  
222 prevalence of HFOs. Nor, relatedly, do they agree particularly well on what constitutes an HFO when  
223 they see one. Other results strongly suggest that, in addition to poor inter-rater agreement, intra-rater  
224 reliability is moderate at best (Gardner et al. 2007). Different reviewers demonstrate strong  
225 preferences for waveforms with differing characteristics. Nonetheless, the level of agreement does  
226 exceed chance – there is a core of commonality worth investigating more thoroughly. But the evidence  
227 makes it clear that, currently, “ground truth” HFO data are a false sense of security, and should be  
228 regarded as suggestive rather than authoritative.

229

230 The automated algorithm we introduce performs similarly to humans at the task of culling positive  
231 exemplars from a large set of candidate HFOs. Humans agree no more with each other than they do  
232 with the machine. The second and third stages of the automated algorithm, taken together, offer at  
233 least a threefold improvement in positive predictive value over the stage 1 detector alone – more if we  
234 consider individual clusters, some of which seem to capture waveform features that are more saliently  
235 HFO-like to humans than others. The automated approach provides the further advantages of being  
236 perpetually consistent in its application of detection criteria and indefatigable in its marking effort.

237

238 The relative uncertainty among humans about what constitutes an HFO gives us confidence in framing

239 our work as exploratory, and in the value of studying the outputs of our algorithm on their own merits.

240 In future work, we will examine the relationship between the clusters our algorithm finds and putative

241 areas of seizure generation.

242 II. Other supporting material

243

244 In addition to the marking study detailed above, we provide several descriptions, figures, and tables that  
 245 supplement other aspects of the main-body text.

246

247 *Stage 2, additional detail*

248 The principal components can be found by successively seeking out the spatial directions along which  
 249 the lengths of the orthogonal projections of the data observations have maximal variance, subject to the  
 250 constraint that each successive direction is orthogonal to its predecessors. These directions are exactly  
 251 the eigenvectors of the covariance matrix,  $\mathbf{C}$ , of the data:

252

253

$$254 \quad \mathbf{C} = \frac{1}{N} \sum_{n=1}^N (\mathbf{b}_n - \bar{\mathbf{b}}) (\mathbf{b}_n - \bar{\mathbf{b}})^T \quad (1)$$

255 where  $\mathbf{b}_n$  is the  $P \times 1$  power spectral density representation of background segment  $n$ , described  
 256 above, and  $\bar{\mathbf{b}}$  is the mean of all  $N$  background segments associated with a given HFO candidate (for us,  
 257  $\bar{\mathbf{b}} = 0$ )<sup>11</sup>. The new coordinates for each background data segment are computed as:

258

259

$$260 \quad \mathbf{X} = \mathbf{BU} \quad (2)$$

261

262

---

<sup>11</sup> Since the number of background segments is smaller than their dimensionality,  $P$ , the data lie in a linear subspace whose maximum dimension is  $N - 1$ . Therefore, at least  $P - N + 1$  eigenvalues (projection variances) must be zero, and this fact is used to increase the efficiency with which the relevant eigendecomposition is performed (Bishop 2006).

263 where  $\mathbf{X}$  is the new  $N \times D$  data matrix of background-segment representations,  $\mathbf{B}$  is the  $N \times P$  matrix  
 264 whose  $i^{th}$  row is  $\mathbf{b}_i^T$ , and  $\mathbf{U}$  is the  $P \times D$  matrix whose columns are the unit-normalized eigenvectors  
 265 of  $\mathbf{C}$  corresponding to the  $D$  largest eigenvalues (for us,  $D = 2$ , as mentioned above). The  $D$ -  
 266 dimensional projection for the HFO candidate segment itself is then computed, after removing the  
 267 mean of the background segments and dividing by their standard deviation, using the same matrix  $\mathbf{U}$ .

268  
 269 The BIC can be derived starting from the Laplace approximation to the “model evidence” (Bishop 2006)  
 270 – the probability of the data given a particular model after marginalizing over all possible values of the  
 271 parameters. Assuming a broad (nearly uniform) Gaussian prior distribution over the parameters and a  
 272 Hessian matrix of the negative log-likelihood function (evaluated at the optimal parameter vector given  
 273 the data) that is of full rank, the evidence for the  $i^{th}$  model ( $\mathcal{M}^i$ ), denoted by  $p(\mathbf{X}|\mathcal{M}^i)$ , can be  
 274 approximated by:

$$277 \quad \ln p(\mathbf{X}|\mathcal{M}^i) \approx \ln p(\mathbf{X}|\mathbf{u}_{\text{ML}}^i, \boldsymbol{\Sigma}_{\text{ML}}^i, \pi_{\text{ML}}^i) - \frac{1}{2} M^i \ln N \quad (3)$$

278  
 279 (Bishop 2006) where the subscript ML stands for the “maximum likelihood” estimates found via EM,  
 280 and the constant  $M^i$  in the second term on the right is the number of free parameters in the  $i^{th}$  model;  
 281 the latter term penalizes model complexity and hence guards against overfitting. The computation in  
 282 (3) is the BIC, and we select the model for which it is largest.

283  
 284 The goal in stage 2 is to assign a given HFO candidate to one of two classes,  $\mathcal{B}$  (background) or  $\mathcal{A}$   
 285 (anomaly), while minimizing the misclassification rate. This is theoretically done by assigning  $\mathbf{h}$  to  $\mathcal{B}$   
 286 whenever

287

288

$$p(\mathcal{B}|\mathbf{h}) > p(\mathcal{A}|\mathbf{h}) \quad (4)$$

289

290

291 (Duda and Hart 1973), where  $\mathbf{h}$  is the 2- $D$  representation of the HFO candidate, discussed above.

292 Applying Bayes's Theorem, this condition can be shown to be equivalent to

293

294

$$p(\mathbf{h}|\mathcal{B}) > \frac{p(\mathbf{h}|\mathcal{A})p(\mathcal{A})}{p(\mathcal{B})} \quad (5)$$

295

296 The GMM describing  $\mathcal{B}$  allows estimation of the quantity on the left directly, but there is no such model

297 describing  $\mathcal{A}$ , and one cannot reasonably be inferred given that there is at most a single observation

298 from  $\mathcal{A}$ . The prior probabilities of  $\mathcal{A}$  and  $\mathcal{B}$ , respectively, are similarly unknown.

299

300 To address these issues, a heuristic criterion is employed, based on the squared Mahalanobis distances,

301  $\Delta_k^2$ , from the HFO candidate to the center of each GMM component, given by:

302

303

304

$$\Delta_k^2 = (\mathbf{h} - \mathbf{u}_k)^T \Sigma_k^{-1} (\mathbf{h} - \mathbf{u}_k) \quad (6)$$

305

306 The squared Mahalanobis distances of a random sample drawn from a multivariate normal distribution

307 (computed using the unbiased sample covariance matrix) will be distributed approximately as central

308 chi-squared with  $D$  degrees of freedom, where  $D$  is the dimensionality of the data (McLachlan 1999).

309 Using the assumption that  $p(\mathbf{h}|\mathcal{A})$  is a monotonic decreasing function of  $p(\mathbf{h}|\mathcal{B})$ , so that the latter is

310 high wherever the former is low, it is estimated that

311

312

$$p(\mathcal{B}|\Delta_1^2, \dots, \Delta_K^2) \approx \sum_{k=1}^K \pi_k \int_{\Delta_k^2}^{\infty} q(t) dt \quad (7)$$

313

314 where  $q(x)$  is the central chi-squared density function with  $\nu$  degrees of freedom:

315

316

$$q(x) = \begin{cases} \frac{1}{2^{\frac{\nu}{2}} \Gamma(\frac{\nu}{2})} x^{\frac{\nu}{2}-1} \exp(-\frac{1}{2}x) & x > 0 \\ 0 & x < 0 \end{cases} \quad (8)$$

317

318 The function  $\Gamma(z)$  is the Gamma function  $\Gamma(z) = \int_0^{\infty} t^{z-1} \exp(-t) dt$ .

319

320 A similar estimate was used by Roberts (Roberts 2000).

321

322 Procedurally, the percentage of the central chi-squared density lying to the right of the calculated

323 Mahalanobis distance from each mixture component is found. A weighted average of these

324 percentages, with weights equal to those of the corresponding mixture components is then computed.

325 If the resultant estimated probability exceeds 5%, the HFO candidate is considered to have been

326 generated by the local background process and it is removed from candidacy. All candidates for which

327 the calculation in (7) – computed with respect to the candidate's unique local background model – falls

328 below the 5% threshold are passed on to the final clustering stage.

329



330

331 **Figure Legends**332 **Figure S1.** HFO marking tool. Screen shot of custom GUI used to present detections to clinical reviewers.

333 **Figure S2.** Human reviewer cluster preferences. Each whole pie represents the total number of  
334 positively marked HFOs by a human reviewer (A: reviewer A; B: reviewer B; C: reviewer C) that were  
335 classified by the machine as belonging to clusters 1, 2, 3, or 4. Pie wedges represent the proportion of  
336 such marks falling into each cluster (blue: cluster 1; green: cluster 2; red: cluster 3; cyan: cluster 4).

337 **Figure S3.** Cluster 1 sample events in context. Raw (left) and 100-500 Hz bandpassed (right) voltage  
338 traces of the five randomly selected events from cluster 1 that appear in figure 5B. Detected events are  
339 demarcated by red lines (solid = start; dotted = stop) and shown within the context of 0.5 seconds of  
340 data on either flank. Events are arranged on the vertical axis in the same order as in figure 5B. In the  
341 abbreviations above each trace, the first letter indicates whether the recording comes from a macro-  
342 (M) or microelectrode (m). RT = right temporal; LPO = left parietooccipital; MR = motor. Note that  
343 identical labels do not imply identical electrodes, only that the electrodes have the same lobar location.

344 **Figure S4.** Cluster 2 sample events in context. Raw (left) and 100-500 Hz bandpassed (right) voltage  
345 traces of the five randomly selected events from cluster 2 that appear in figure 5B. Detected events are  
346 demarcated by red lines (solid = start; dotted = stop) and shown within the context of 0.5 seconds of  
347 data on either flank. Events are arranged on the vertical axis in the same order as in figure 5B. In the  
348 abbreviations above each trace, the first letter indicates whether the recording comes from a macro-  
349 (M) or microelectrode (m). LIF = left inferior frontal; LT = left temporal; AT = anterior temporal. Note  
350 that identical labels do not imply identical electrodes, only that the electrodes have the same lobar  
351 location.

352 **Figure S5.** Cluster 3 sample events in context. Raw (left) and 100-500 Hz bandpassed (right) voltage  
353 traces of the five randomly selected events from cluster 3 that appear in figure 5B. Detected events are  
354 demarcated by red lines (solid = start; dotted = stop) and shown within the context of 0.5 seconds of  
355 data on either flank. Events are arranged on the vertical axis in the same order as in figure 5B. In the  
356 abbreviations above each trace, the first letter indicates whether the recording comes from a macro-  
357 (M) or microelectrode (m). A = anterior; LAMT = left anterior mesial temporal. Note that identical labels  
358 do not imply identical electrodes, only that the electrodes have the same lobar location.

359 **Figure S6.** Cluster 4 sample events in context. Raw (left) and 100-500 Hz bandpassed (right) voltage  
360 traces of the five randomly selected events from cluster 4 that appear in figure 5B. Detected events are  
361 demarcated by red lines (solid = start; dotted = stop) and shown within the context of 0.5 seconds of  
362 data on either flank. Events are arranged on the vertical axis in the same order as in figure 5B. In the  
363 abbreviations above each trace, the first letter indicates whether the recording comes from a macro-  
364 (M) or microelectrode (m). RF = right frontal; LPO = left parietooccipital; RT = right temporal. Note that  
365 identical labels do not imply identical electrodes, only that the electrodes have the same lobar location.

366

367

368

369 **References**

- 370 **Bishop CM.** *Pattern Recognition and Machine Learning*. New York, NY: Springer Science+Business Media,  
371 LLC, 2006, p. 738.
- 372 **Cohen J.** A Coefficient of Agreement for Nominal Scales. *Education and Psychological Measurement* 20:  
373 37-46, 1960.
- 374 **Crépon B, Navarro V, Hasboun D, Clemenceau S, Martinerie J, Baulac M, Adam C, and Le Van Quyen**  
375 **M.** Mapping Interictal Oscillations Greater Than 200 Hz Recorded With Intracranial Macroelectrodes In  
376 Human Epilepsy. *Brain* 133: 33-45, 2010.
- 377 **Csicsvari J, Hirase H, Czurko A, Mamiya A, and Buzsaki G.** Fast Network Oscillations in the Hippocampal  
378 CA1 Region of the Freely Behaving Rat. *The Journal of Neuroscience* 19: 1999a.
- 379 **Csicsvari J, Hirase H, Czurko A, Mamiya A, and Buzsaki G.** Oscillatory Coupling of Hippocampal  
380 Pyramidal Cells and Interneurons in the Behaving Rat. *The Journal of Neuroscience* 19: 274-287, 1999b.
- 381 **Duda RO, and Hart PE.** *Pattern Classification and Scene Analysis*. New York: John Wiley and Sons, 1973.
- 382 **Gardner AB, Worrell GA, Marsh E, Dlugos D, and Litt B.** Human and Automated Detection of High-  
383 Frequency Oscillations in Clinical Intracranial EEG Recordings. *Clinical Neurophysiology* 118: 1134-1143,  
384 2007.
- 385 **McLachlan GJ.** Mahalanobis Distance. *Resonance* 4: 20-26, 1999.
- 386 **Roberts SJ.** Extreme Value Statistics for Novelty Detection in Biomedical Signal Processing. *IEEE*  
387 *Proceedings Science, Technology, & Measurement* 47: 363-367, 2000.
- 388 **Schevon CA, Trevelyan AJ, Schroeder CE, Goodman RR, McKhann Jr. G, and Emerson RE.** Spatial  
389 characterization of Interictal High Frequency Oscillations in Epileptic Neocortex. *Brain* 132: 3047-3059,  
390 2009.

391 **Staba RJ, Fighetto L, Behnke EJ, Mathern GW, Fields T, Bragin A, Ogren J, Fried I, Wilson CL, and Engel**  
392 **J, Jr.** Increased Fast Ripple to Ripple Ratios Correlate with Reduced Hippocampal Volumes and Neuron  
393 Loss in Temporal Lobe Epilepsy Patients. *Epilepsia* 48: 2130-2138, 2007.

394 **Staba RJ, Wilson CL, Bragin A, Fried I, and Engel J, Jr.** Quantitative Analysis of High-Frequency  
395 Oscillations (80–500 Hz) Recorded in Human Epileptic Hippocampus and Entorhinal Cortex. *Journal of*  
396 *Neurophysiology* 88: 1743-1752, 2002.

397 **Worrell GA, Gardner AB, Stead SM, Hu S, Goerss S, Cascino GJ, Meyer FB, Marsh R, and Litt B.** High-  
398 Frequency Oscillations in Human Temporal Lobe: Simultaneous Microwire and Clinical Macroelectrode  
399 Recording. *Brain* 131: 928-937, 2008.

400

401
