# Supplementary material
Source: PubMed Central journal article supplement (PMC2997042)
Supplement: supp_01082.2009_tableS2.pdf [file supp_01082.2009_tableS2.pdf]

Table S2. Performance Metrics, Modified Ground Truth

|                        | <b>A</b>     | <b>B</b>     | <b>C</b>     | <b>M</b>     |
|------------------------|--------------|--------------|--------------|--------------|
| <b>Sensitivity (%)</b> | 78.1 (1.2)   | 44.2 (17.6)  | 55.2 (4.9)   | 69.1 (14.0)  |
| <b>Specificity (%)</b> | 81.5 (1.1)   | 98.9 (2.4)   | 93.5 (1.3)   | 93.4 (2.3)   |
| <b>Accuracy (%)</b>    | 81.1 (1.0)   | 93.3 (2.9)   | 89.5 (1.0)   | 90.9 (3.0)   |
| <b>Precision (%)</b>   | 32.5 (5.2)   | 82.4 (40.0)  | 49.1 (11.1)  | 54.6 (18.0)  |
| <b>F-measure</b>       | 0.46 (0.057) | 0.58 (0.253) | 0.52 (0.087) | 0.61 (0.167) |

Modified ground truth data set formed by taking as positive HFOs all stage 1 detections marked positive by at least two detectors (human or automated). Values in parentheses are chance corrected.
