# Supplementary material
Source: PubMed Central journal article supplement (PMC2997042)
Supplement: supp_01082.2009_tableS3.pdf [file supp_01082.2009_tableS3.pdf]

Table S3. Cluster Purity

|                  | <b>Majority</b> | <b>Union</b> |
|------------------|-----------------|--------------|
| <b>Cluster 1</b> | 0.15            | 0.40         |
| <b>Cluster 2</b> | 0.01            | 0.11         |
| <b>Cluster 3</b> | 0.32            | 0.54         |
| <b>Cluster 4</b> | 0.21            | 0.67         |

Entries are the proportion of events marked as positive HFOs according to the ground truth rule specified by the column heading.
