# Supplementary material
Source: PubMed Central journal article supplement (PMC2997042)
Supplement: supp_01082.2009_tableS4.pdf [file supp_01082.2009_tableS4.pdf]

Table S4. Patient Characteristics and Implanted Electrodes

| Subject | Age | Gender | Epilepsy Risk Factor                                 | Pathology                                                            | Electrode Types                                                                                                                                              | Electrode Placements                                                                                                                                                                               |
|---------|-----|--------|------------------------------------------------------|----------------------------------------------------------------------|--------------------------------------------------------------------------------------------------------------------------------------------------------------|----------------------------------------------------------------------------------------------------------------------------------------------------------------------------------------------------|
| CT 01   | 44  | F      | n/a                                                  | n/a                                                                  | 4 x 4 hybrid                                                                                                                                                 | Right Motor                                                                                                                                                                                        |
| CT 02   | 46  | F      | n/a                                                  | n/a                                                                  | 4 x 6 hybrid                                                                                                                                                 | Left Motor                                                                                                                                                                                         |
| SZ 01   | 35  | F      | Oligodendroglioma (prior to tumor surgery at age 25) | Oligodendroglioma and gliosis                                        | 6 x 6 standard<br>1 x 8 hybrid                                                                                                                               | Right Frontal<br>Motor                                                                                                                                                                             |
| SZ 02   | 24  | M      | none                                                 | Cortical dysplasia (Taylor type I)                                   | 4 x 6 hybrid<br>6 x 6 standard                                                                                                                               | Left Frontal<br>Left Frontoparietal                                                                                                                                                                |
| SZ 03   | 21  | F      | Traumatic brain injury, left frontal head at age 1   | Severe subpial gliosis                                               | 1 x 4 standard<br>1 x 4 standard<br>1 x 4 hybrid<br>1 x 8 standard<br>1 x 4 hybrid<br>1 x 4 hybrid<br>1 x 4 standard depth<br>1 x 4 standard depth           | Anterior Left Subfrontal<br>Middle Left Subfrontal<br>Posterior Left Subfrontal<br>Anterior Left Mesial Temporal<br>Middle Left Subtemporal<br>Posterior Left Subtemporal<br>Anterior<br>Posterior |
| SZ 04   | 39  | F      | none                                                 | Marked gliosis, predominantly subcortical and subpial; temporal lobe | 6 x 6 standard<br>1 x 8 standard<br>1 x 8 standard<br>1 x 4 standard<br>1 x 4 standard<br>1 x 4 hybrid depth<br>1 x 4 standard depth                         | Left Temporal<br>Left Inferior Frontal<br>Left Superior Frontal<br>Left Temporal Anterior<br>Left Temporal Posterior<br>Left Anterior<br>Left Posterior                                            |
| SZ 05   | 21  | F      | none                                                 | Subpial gliosis                                                      | 4 x 6 standard<br>1 x 4 standard<br>1 x 4 standard<br>1 x 4 standard<br>1 x 4 standard<br>1 x 8 standard<br>1 x 4 hybrid<br>1 x 4 standard<br>1 x 4 standard | Left Temporal<br>Anterior Temporal<br>Anterior Mesial Temporal<br>Mesial Temporal<br>Posterior Temporal<br>Frontal<br>Anterior Temporal Depth<br>Middle Temporal Depth<br>Posterior Temporal Depth |
| SZ 06   | 42  | M      | Ependymoma, resected at age 10                       | Marked subpial gliosis; recurrence of ependymoma                     | 4 x 6 hybrid<br>6 x 8 standard                                                                                                                               | Left Parietooccipital<br>Left Frontoparietal                                                                                                                                                       |
| SZ 07   | 42  | F      | none                                                 | Dysplasia and gliosis                                                | 6 x 8 standard<br>3 x 8 standard<br>1 x 4 hybrid<br>1 x 4 standard<br>1 x 8 hybrid                                                                           | Right Frontal<br>Right Temporal<br>Right Anterior Temporal<br>Right Inferior Temporal<br>Right Posterior Temporal                                                                                  |
| SZ 08   | 38  | F      | Closed head injury                                   | Severe subpial gliosis                                               | 6 x 6 standard<br>1 x 4 hybrid depth<br>1 x 4 hybrid depth<br>1 x 4 standard depth                                                                           | Left Temporal<br>Left Anterior Temporal<br>Middle Temporal<br>Posterior Temporal                                                                                                                   |
| SZ 09   | 27  | M      | Astrocytoma, resected at age 10                      | Encephalomalacia; previous astrocytoma resection                     | 8 x 8 standard<br>1 x 4 standard<br>1 x 4 hybrid<br>1 x 8 standard<br>1 x 4 hybrid<br>1 x 4 standard<br>1 x 4 standard                                       | Right Frontal<br>Superior Right Interhemispheric<br>Inferior Right Interhemispheric<br>Right Frontopolar<br>Superior Right Lateral Temporal<br>Inferior Right Lateral Temporal                     |

CT = Control subject; SZ = Seizure subject.
