# Supplementary material
Source: PubMed Central journal article supplement (PMC2997042)
Supplement: supp_01082.2009_tableS5.pdf [file supp_01082.2009_tableS5.pdf]

Table S5. Event Rates and Amplitudes by Subject

| Sub.  | Macro Event Rate<br>(x10 <sup>-3</sup> events/s) | Micro Event Rate<br>(x10 <sup>-3</sup> events/sec) | Macro Event RMS<br>Amplitude (μV) | Micro Event RMS<br>Amplitude (μV) |
|-------|--------------------------------------------------|----------------------------------------------------|-----------------------------------|-----------------------------------|
| CT 01 | (16, 2.69, 1.77)                                 | (128, 1.43, 1.97)                                  | (1334, 22, 50)                    | (7894, 67, 105)                   |
| CT 02 | (24, 1.35, 0.87)                                 | (104, 0.87, 1.13)                                  | (1657, 49, 158)                   | (6157, 56, 148)                   |
| SZ 01 | (39, 0.26, 0.44)                                 | (6, 1.17, 0.81)                                    | (2300, 37, 37)                    | (252, 48, 42)                     |
| SZ 02 | (23, 1.33, 1.26)                                 | (103, 1.11, 1.09)                                  | (2051, 18, 22)                    | (7854, 87, 192)                   |
| SZ 03 | (36, 3.03, 1.25)                                 | (33, 3.78, 2.96)                                   | (6249, 24, 22)                    | (6055, 43, 91)                    |
| SZ 04 | (62, 1.87, 0.71)                                 | (28, 0.94, 0.85)                                   | (10393, 23, 23)                   | (2024, 21, 36)                    |
| SZ 05 | (56, 1.95, 0.75)                                 | (28, 4.28, 1.23)                                   | (25885, 22, 19)                   | (26592, 105, 184)                 |
| SZ 06 | (23, 0.40, 0.50)                                 | (92, 0.82, 0.74)                                   | (3087, 27, 55)                    | (25883, 72, 127)                  |
| SZ 07 | (64, 2.45, 1.33)                                 | (22, 0.00, 0.83)                                   | (52232, 22, 74)                   | (783, 135, 285)                   |
| SZ 08 | (48, 0.56, 0.22)                                 | (56, 4.00, 5.57)                                   | (917, 208, 851)                   | (7345, 83, 233)                   |
| SZ 09 | (88, 0.24, 0.12)                                 | (22, 0.00, 0.16)                                   | (507, 231, 259)                   | (78, 11, 487)                     |

Entries in columns "Macro Event Rate" and "Micro Event Rate" are (*number of electrodes, median, interquartile range*). Entries in columns "Macro Event RMS" and "Micro Event RMS" are (*number of events, median, interquartile range*). Putative artifact cluster (i.e. cluster 2) events are excluded from the table.
