# Supplementary material
Source: PubMed Central journal article supplement (PMC2997042)
Supplement: supp_01082.2009_tableS6.pdf [file supp_01082.2009_tableS6.pdf]

Table S6. Event Amplitudes by Cluster

| <b>Cluster</b> | <b>RMS amplitude (<math>\mu\text{V}</math>)</b> |
|----------------|-------------------------------------------------|
| <b>1</b>       | (70671, 19, 22)                                 |
| <b>2</b>       | (92744, 275, 702)                               |
| <b>3</b>       | (38945, 92, 174)                                |
| <b>4</b>       | (87913, 62, 140)                                |

Entries are (*number of events, median, interquartile range*).
