# Supplementary material
Source: PubMed Central journal article supplement (PMC2997042)

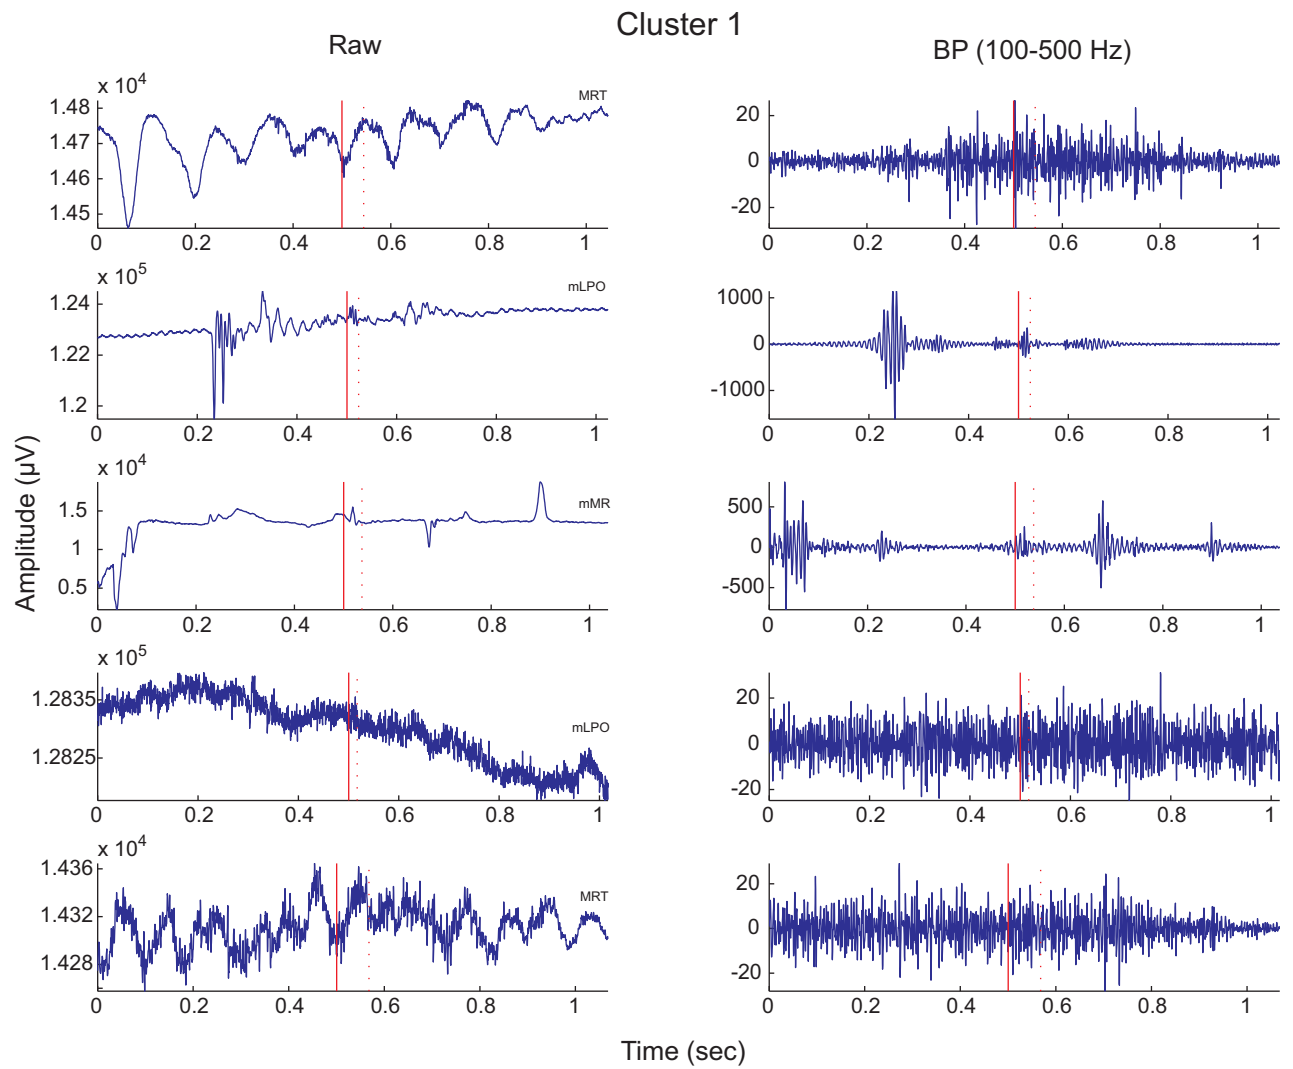

Figure S3.

Supplement: supp_01082.2009_figS3.pdf [file supp_01082.2009_figS3.pdf]

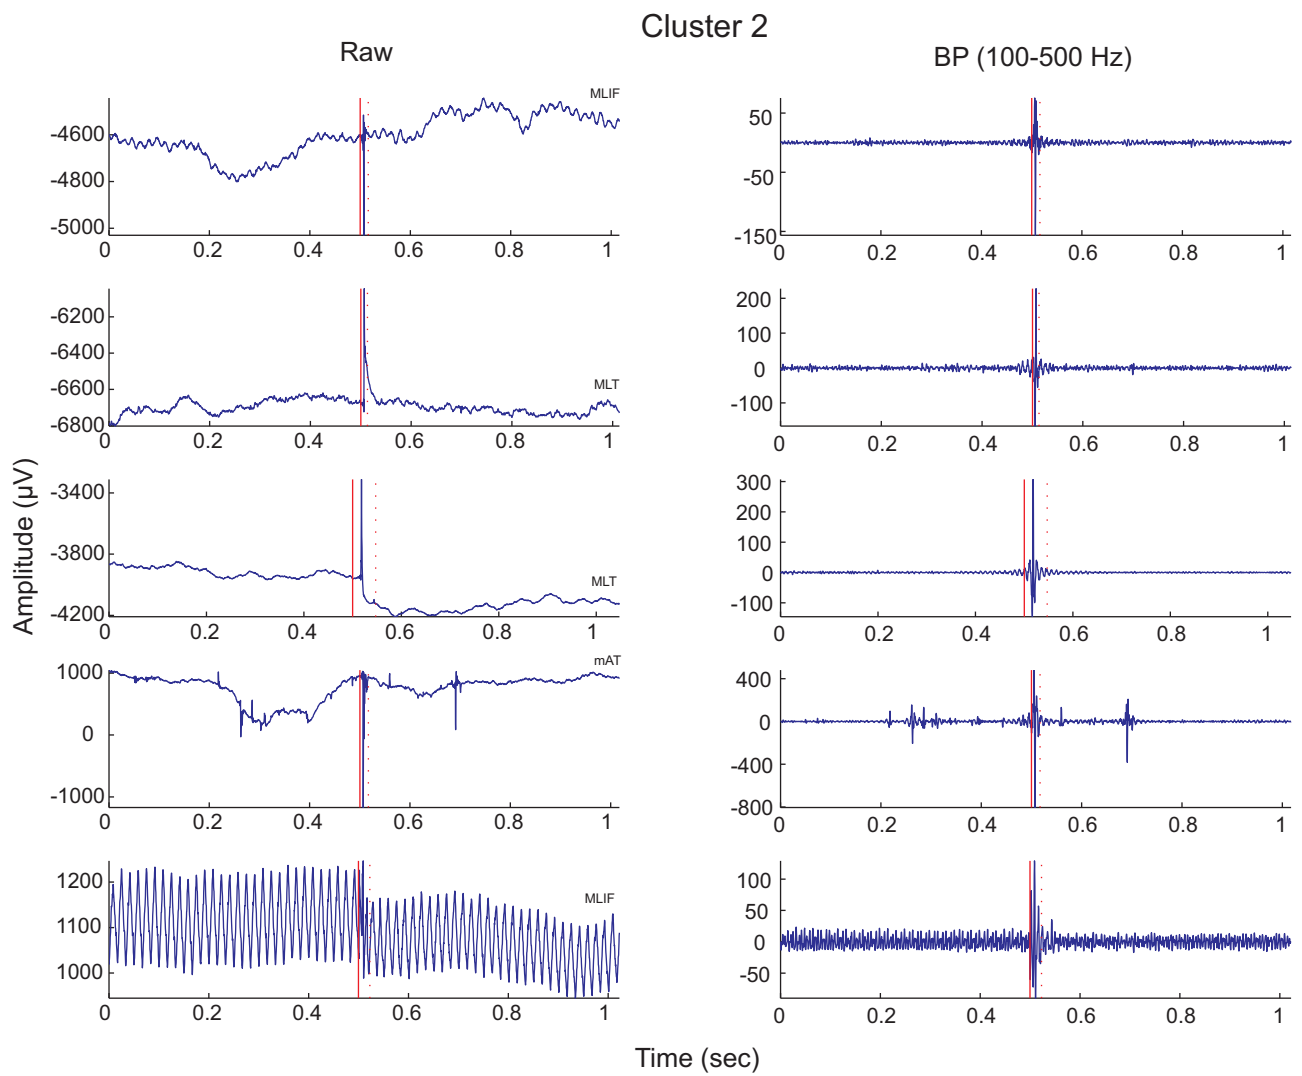

Figure S4.

Supplement: supp_01082.2009_figS4.pdf [file supp_01082.2009_figS4.pdf]

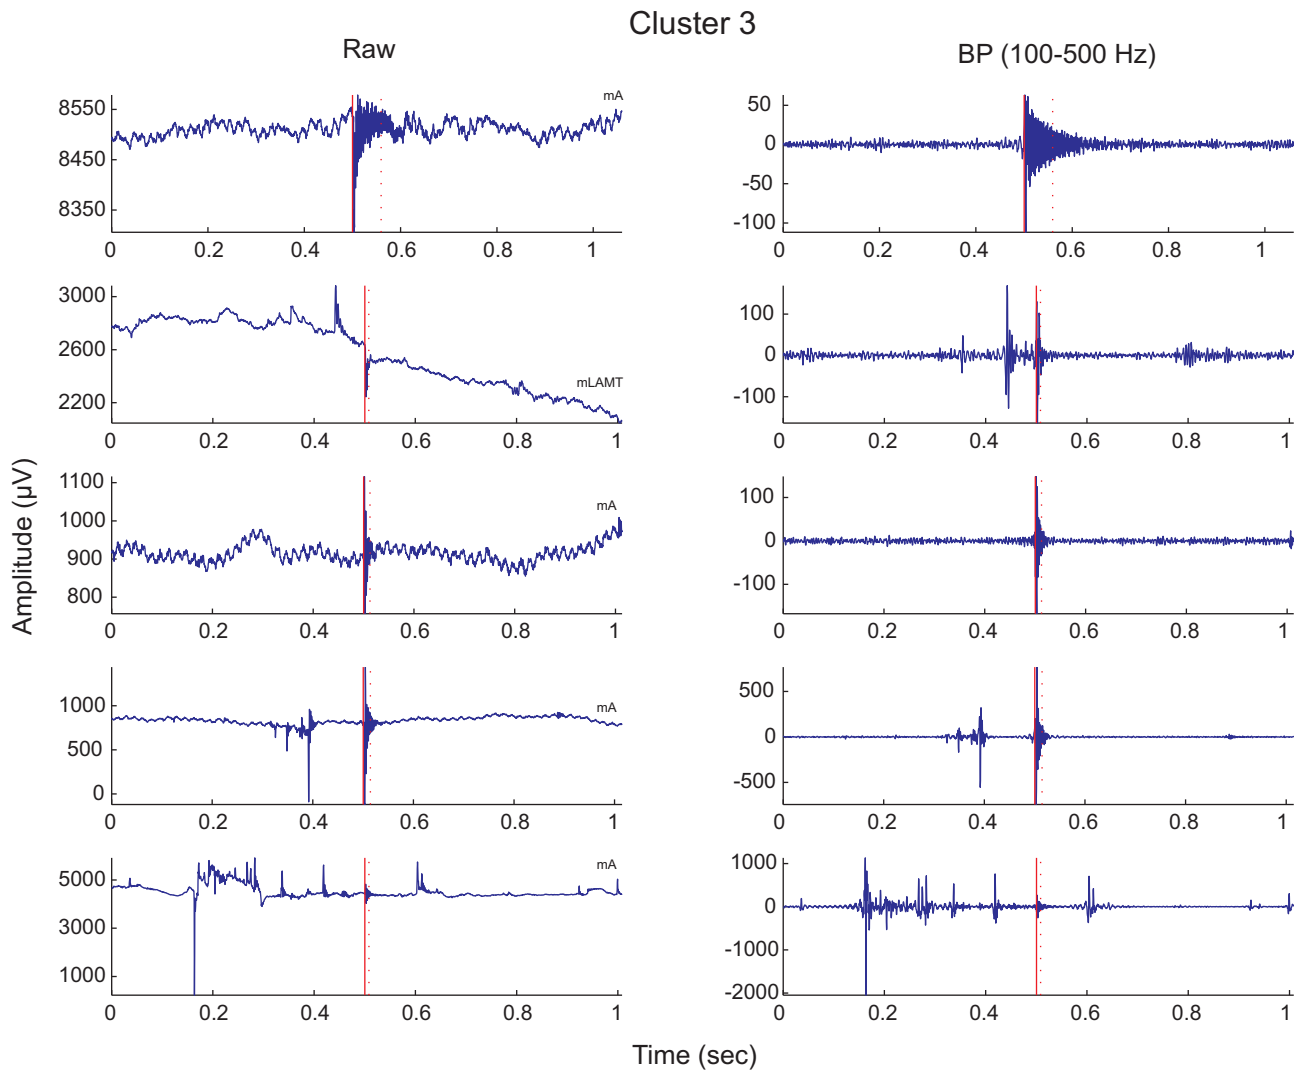

Figure S5.

Supplement: supp_01082.2009_figS5.pdf [file supp_01082.2009_figS5.pdf]
